# Supplementary material for: In situ synthesis of silver nanostructures on magnetic Fe3O4@organosilicon microparticles for rapid hydrogenation catalysis
Source: Royal Society of Chemistry journal article supplement (doi:10.1039/c5ra08963h), 2015-01-01
Supplement: c5ra08963h1.pdf [file c5ra08963h1.pdf]

## In situ synthesis of silver nanostructures on magnetic Fe<sub>3</sub>O<sub>4</sub>@organosilicon microparticles for rapid hydrogenation catalysis

Songfang Zhao<sup>1</sup>, Yongju Gao<sup>1,2</sup>, Jinhui Li<sup>1</sup>, Guoping Zhang<sup>\*,1</sup>, Rong Sun<sup>\*,1</sup>, Ching-Ping Wong<sup>3,4</sup>

<sup>1</sup>Shenzhen Institutes of Advanced Technology, Chinese Academy of Sciences, Shenzhen 518055, China

<sup>2</sup>Nano Science and Technology Institute, University of Science and Technology of China (USTC), Suzhou 215123, China

<sup>3</sup>School of Materials Science and Engineering, Georgia Institute of Technology, 771 Ferst Drive, Atlanta, Georgia, 30332, United States

<sup>4</sup>Department of Electronic Engineering, Faculty of Engineering, The Chinese University of Hong Kong, Hong Kong

\*E-mail: [gp.zhang@siat.ac.cn](mailto:gp.zhang@siat.ac.cn) and [rong.sun@siat.ac.cn](mailto:rong.sun@siat.ac.cn)

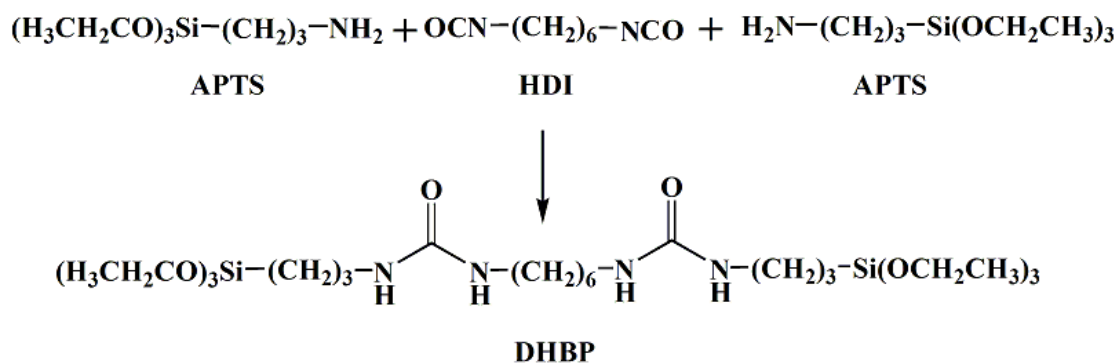

**Scheme S1.** Synthetic procedure of disilylated hexamethylene-bridged precursor.

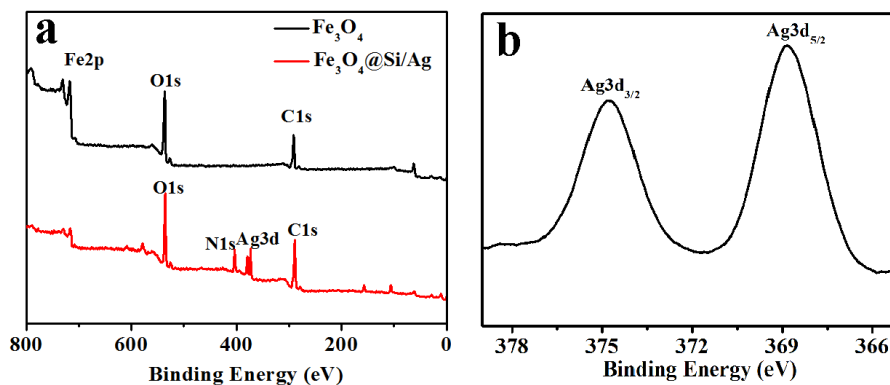

Fig S1. (a) XPS fully scanned spectra of Fe<sub>3</sub>O<sub>4</sub> and Fe<sub>3</sub>O<sub>4</sub>@Si/Ag, (b) XPS spectra of Ag 3d.

**Table S1.** Surfaces properties of samples Fe<sub>3</sub>O<sub>4</sub>, Fe<sub>3</sub>O<sub>4</sub>@Si and Fe<sub>3</sub>O<sub>4</sub>@Si/Ag

| Sample                                | Structural parameters                              |                                                |                        |
|---------------------------------------|----------------------------------------------------|------------------------------------------------|------------------------|
|                                       | BET surface area (m <sup>2</sup> g <sup>-1</sup> ) | Pore volume (cm <sup>3</sup> g <sup>-1</sup> ) | Average pore size (nm) |
| Fe <sub>3</sub> O <sub>4</sub>        | 20.13                                              | 0.036                                          | 9.95                   |
| Fe <sub>3</sub> O <sub>4</sub> @Si    | 9.57                                               | 0.048                                          | 24.7                   |
| Fe <sub>3</sub> O <sub>4</sub> @Si/Ag | 10.77                                              | 0.047                                          | 21.31                  |

**Table S2.** Magnetization of Fe<sub>3</sub>O<sub>4</sub>, Fe<sub>3</sub>O<sub>4</sub>@Si and Fe<sub>3</sub>O<sub>4</sub>@Si/Ag

| Sample                                | Ms (emu/g) | Mr (emu/g) | Hc (Oe) | Sr    |
|---------------------------------------|------------|------------|---------|-------|
| Fe <sub>3</sub> O <sub>4</sub>        | 81.1       | 5.5        | 34.9    | 0.067 |
| Fe <sub>3</sub> O <sub>4</sub> @Si    | 15.3       | 0.84       | 43.8    | 0.047 |
| Fe <sub>3</sub> O <sub>4</sub> @Si/Ag | 11.6       | 0.63       | 47.9    | 0.048 |

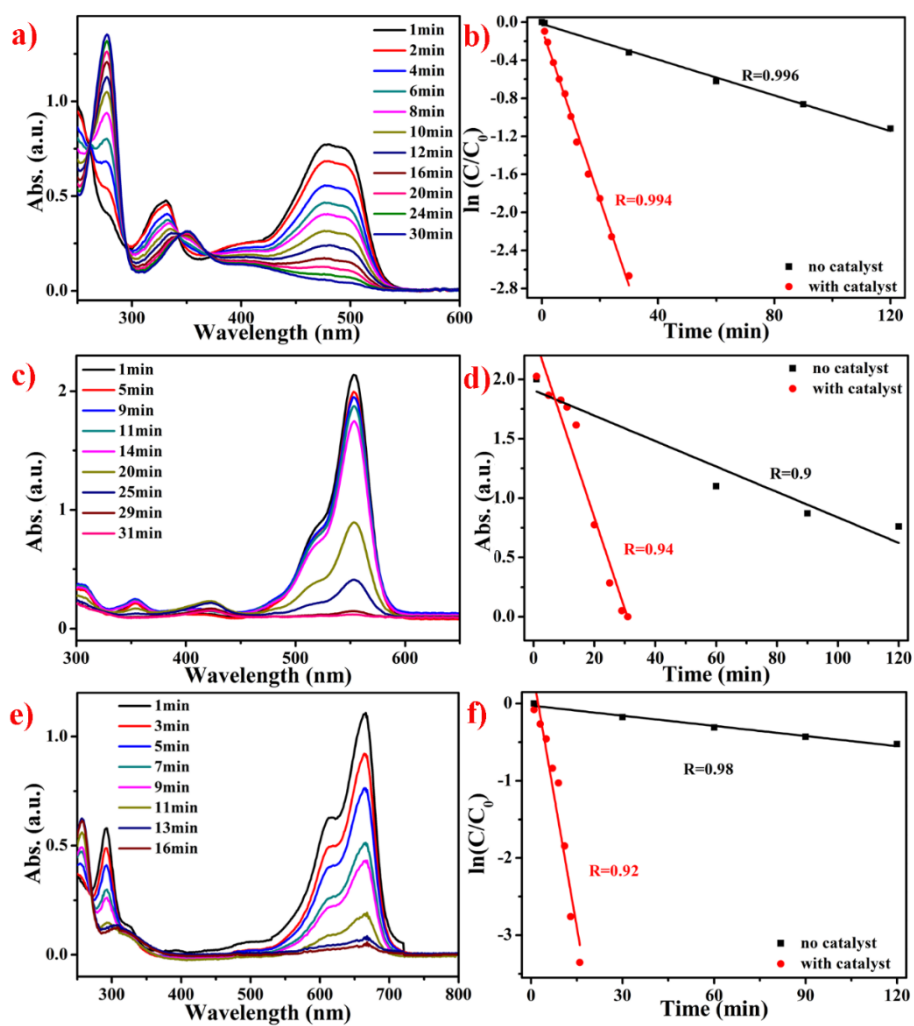

**Fig. S2.** UV-vis absorption spectra of catalytic degradation of (a) OG, (c) RhB, (e) MB by  $\text{NaBH}_4$  with  $\text{Fe}_3\text{O}_4@\text{Si}/\text{Ag}$  catalyst; Plots of  $\ln(C/C_0)$  vs. reaction time  $t$  for (b) OG, (f) MB, and plots of  $C/C_0$  vs. reaction time  $t$  for (d) RhB.
